# Supplementary material for: Uncovering the true mechanism of optical detection of HSO4− in water by Schiff-base receptors – hydrolysis vs. hydrogen bonding
Source: Royal Society of Chemistry journal article supplement (doi:10.1039/c2cc33130f), 2012-01-01
Supplement: c2cc33130f.pdf [file c2cc33130f.pdf]

**Supplementary Information's**  
**Uncovering the true mechanism of Optical detection of  $\text{HSO}_4^-$  in water by Schiff Base receptors - Hydrolysis vs. Hydrogen Bonding**

**Virendra Kumar,<sup>‡</sup> Ajit Kumar,<sup>‡</sup> Uzra Diwan and K. K. Upadhyay\***

*Department of Chemistry (Centre for Advanced Study), Faculty of Science, Banaras Hindu University, Varanasi-221005, India*

\*drkaushalbhu@yahoo.co.in; Tel. No. 91-542-6702488

<sup>‡</sup>These authors contributed equally.

---

**TABLE OF CONTENTS**

- 1. Experimental - Page 2**
- 2. Discussions - Page 3-6**
- 3. Figures and Captions – Page 7-33**

## 1. EXPERIMENTAL

**1.1 Apparatus:** The IR Spectra for the receptors (**1, 3 and 4**) were recorded on JASCO-FTIR Spectrophotometer while  $^1\text{H}$  NMR spectra were recorded on a Bruker-400 Avance NMR Spectrometer and JEOL AL 300 FT NMR Spectrometer. Mass spectrometric analysis were carried out on a MDS Sciex API 2000 LCMS spectrometer. Electronic spectra were recorded at room temperature (298 K) on a UV-1700 pharماسpec spectrophotometer with quartz cuvette (path length=1 cm). Emission spectra were recorded on Varian Cary Eclipse Fluorescence spectrophotometer.

**1.2 Materials:** All reagents for synthesis were purchased from Sigma-Aldrich and were used without further purification.

**1.3 General Methods:** All titration experiments were carried at room temperature. All the anions were used as their tetrabutylammonium (TBA) salts while metal ions were used as their chloride salts. The  $^1\text{H}$  NMR titrations were carried out by using tetramethylsilane (TMS) as an internal reference standard.

**1.4 X-ray diffraction studies:** Single crystal X-ray data of receptor 4 was collected on an Oxford Diffraction Xcalibur system with a Ruby CCD detector. All the determinations of unit cell and intensity data were performed with graphite-monochromated Mo-K $\alpha$  radiation ( $\lambda = 0.71073 \text{ \AA}$ ). Data for the receptor was collected at room temperature. The structures were solved by direct methods, using Fourier techniques, and refined on  $F^2$  by a full-matrix least squares method. All the calculations were carried out with the SHELX-97 program.

## 2. DISCUSSIONS

To prove the exact mechanism of  $\text{HSO}_4^-$  sensing through Schiff base type receptors in aqueous medium four fluorescent receptors (receptor **1-4**) were already discussed in the main text. Now we are elaborating four more receptors (**receptor 5-8**) of colorimetric type to strengthen the discussed mechanism;

In this context first of all we took the colorimetric Schiff base receptor reported by Wei et al. (receptor **5**) recently [3b]. The receptor was synthesized by the authors through Schiff base condensation between *5-(p-nitro-phenylazo)-salicylaldehyde* and *5-amino-1,3,4-thiadiazol-2-carboxylic acid*. The two characteristic absorption bands in UV-visible spectrum of receptor **5** were found at 488 nm and 376 nm. The receptor **5** underwent bleaching with  $\text{HSO}_4^-$  as reported by authors in  $\text{H}_2\text{O}/\text{DMSO}$  (3.8:6.2, v/v) solution. Upon the addition of  $\text{HSO}_4^-$  anion, there was a prominent change in the form of vanishing of the band at 488 nm while a new strong absorption band at 370 nm was appeared. The appearance of new absorption band at 370 nm in the presence of  $\text{HSO}_4^-$  ion was explained by authors in terms of formation of hydrogen bonded species between receptor and anion. However bathochromic shifting has been reported for the real hydrogen bonded cases of anions with similar receptors. The corresponding aldehyde i.e., *5-(p-nitro-phenylazo)-salicylaldehyde* is also reported to absorb at ~376 nm [12] which further supported above hydrolytic proposal. Hence here also on the basis of above UV-visible spectral changes we concluded that once again the hydrolysis of Schiff base occurred, which was reflected in terms of UV-visible band at 370 nm, which is the absorption band for aldehyde counterpart i.e., *5-(p-nitro-phenylazo)-salicylaldehyde*. Hence the colorimetric sensing of  $\text{HSO}_4^-$  ion by receptor **5** through the hydrogen bonding between them as claimed by authors is once again not convincing.

Moreover, Wei et al. as co-author with Zhang et al. [3c] reported a series of Schiff base receptors (**6a-d**) previously also for colorimetric detection of  $\text{HSO}_4^-$  ion in  $\text{H}_2\text{O}-\text{DMSO}$  (5/95, v/v) solution. The aldehyde counterpart i.e., *5-(p-nitro-phenylazo)-salicylaldehyde* in receptors **6c & d** were same as it was for receptor **5** while they took *5-(phenylazo)-salicylaldehyde* for receptor **6a & b**. According to the authors no hydrogen bonding as claimed above for receptor **5** by Wei et al., was responsible for the drastic color change (in receptor **6c & d**). However the protonation of the Ar-OH along with the configurational transformation upon addition of  $\text{HSO}_4^-$  was considered responsible for the same. In contrast to receptor **6c & d**, the addition of  $\text{HSO}_4^-$  to the solutions of the less conjugated receptors **6a** and **6b** did not induce a color change. Accordingly authors claimed that the most conjugated receptors **6d** along with **6c** displayed high selectivity either for basic anions or for  $\text{HSO}_4^-$  in a water-containing medium and proposed classical Bronsted acid-base reaction.

Although Zhang et al. proposed the acidic nature of  $\text{HSO}_4^-$  ion as the responsible factor for sensing but the site of protonation according to them was phenolic  $-\text{OH}$  not the imine nitrogen. They tried to support their argument by the fact that on protonation of phenolic  $-\text{OH}$  by  $\text{HSO}_4^-$  the blue shift took place. If receptor **6c & d** were prone towards protonation than the same must be the case for receptors **6a & b**. However no change in color or UV-visible spectrum of receptors **6a & b** not having any  $-\text{NO}_2$  groups were observed. Nevertheless the perusal of the spectra of **6a & b** clearly proved that in both the cases hydrolysis of imine bond took place on addition of  $\text{HSO}_4^-$  leading to formation of starting material i.e., aldehyde and amine. The blue shifting in absorption band of receptors **6a & b** at  $\sim 340$  nm while for **6c & d** were at  $\sim 374$  nm upon addition of  $\text{HSO}_4^-$  ion. These absorption bands can be assigned to the corresponding aldehyde counterparts i.e., *5-(phenylazo)-salicylaldehyde* and *5-(p-nitro-phenylazo)-salicylaldehyde* respectively [12]. Hence even though Zhang et al. accepted the acidic nature of  $\text{HSO}_4^-$  as responsible for the sensing of same yet his proposal of protonation of phenolic  $-\text{OH}$  of receptor is not convincing one. Thus we are not out rightly opposing the protonation phenomenon of receptor in the presence of  $\text{HSO}_4^-$  ion but definitely the species proposed by authors are not the species responsible for the color change of receptors **6c-d**.

Author's case has further weakened by the fact that in spite of the different amine counterparts in the receptors (**5, 6c-d**), UV-visible band and color of the receptors in the presence of  $\text{HSO}_4^-$  ion were same. Furthermore in spite of having few same authors in both the cases but in one case they take an account of basic nature of  $\text{HSO}_4^-$  ion [3b] while in other the acidic nature even though the type of Schiff base receptor is almost similar [3c]. Here it is worth to mention that all these receptors (**6a-d**) underwent hydrolysis but the chromogenic responses were observed only for the (**6c & 6d**). Presence of electron withdrawing nitro group in receptor **6c & d** made them an efficient ICT probe and hence they absorbed at higher wavelengths (towards visible region) while receptors without nitro substituents absorbed towards lower wave length (towards UV region). Upon addition of  $\text{HSO}_4^-$  ion to these receptors the cleavage of Schiff base took place and a higher extent of blue shift was possible for **5, 6c & 6d** leading to a visible color change while receptors without nitro substituent produced only a meager amount of blue shift and although hydrolysis took place but no obvious color change were observed in these cases.

Furthermore two more colorimetric receptors (**receptor 7 & 8**) reported by Jiang et al. [3d,e] may be further helpful in understanding the above sensing mechanism. Jiang et al. reported a simple Schiff base receptor **7** based on thiosemicarbazide derivative of 1-naphthaldehyde. This receptor showed fluoride induced chromogenic changes which can be totally reversed with addition of  $\text{HSO}_4^-$ . In the continuation of above study later they synthesized a polymeric form of receptor **7** to develop new polymer-

based sensory materials (**Receptor 8**). Both of the receptor **7** and **8**, gave fluoride-induced chromogenic responses which were totally reversed by adding 1 equiv. of proton (aqueous hydrochloric acid solution) or adding  $\text{HSO}_4^-$  anions. The complete sensing process involves fluoride induced deprotonation of receptor **7/8** and reversal of color and UV-visible spectrum once again on the addition of  $\text{HSO}_4^-$ . Actually the addition of  $\text{HSO}_4^-$  to receptor-fluoride complex protonated the receptor replacing the fluoride in the form of HF or  $\text{HF}_2^-$ .

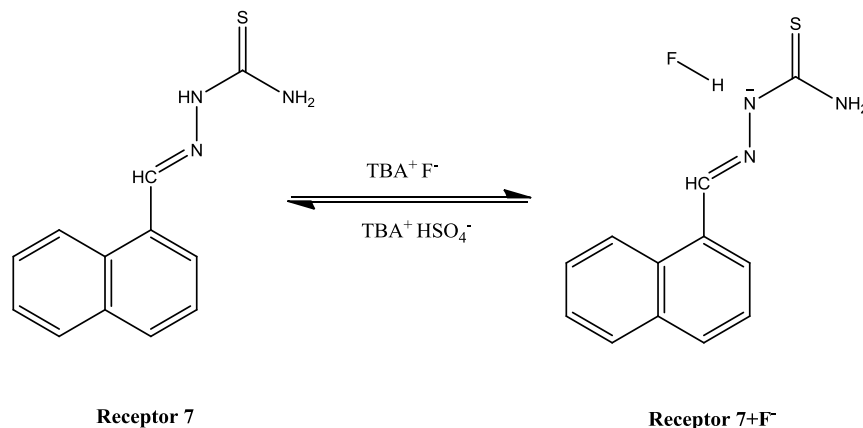

### Receptor 7 reported by Jiang et al. and effect of TBAF and TBAHSO<sub>4</sub> on receptor 7

Hence the above example also indicated towards the acidic nature of  $\text{HSO}_4^-$  ion and explained the reversal of the color of receptor + fluoride complex. In short the whole sensing process discussed above is an acid-base indicator. The  $\text{H}^+$  and  $\text{F}^-$  ions competes with each other only and no option for hydrolysis of Schiff base was possible here as the same was observed in other Schiff base receptor in the presence of  $\text{HSO}_4^-$  ion. However, this study clearly established the acidic nature of  $\text{HSO}_4^-$  ion in aqueous/semi aqueous medium which was not considered by Kim et al. and Wei et al. leading to proposal of an improper sensing mechanism for interaction of Schiff bases with  $\text{HSO}_4^-$  ion. The hydrolytic action of  $\text{HSO}_4^-$  was further supported when Schiff base receptor **1** and **4** produced almost similar observations as in the case of  $\text{HSO}_4^-$  when they were treated individually with very small amount of dilute mineral acids like HCl,  $\text{H}_2\text{SO}_4$  etc. (see Figures below).

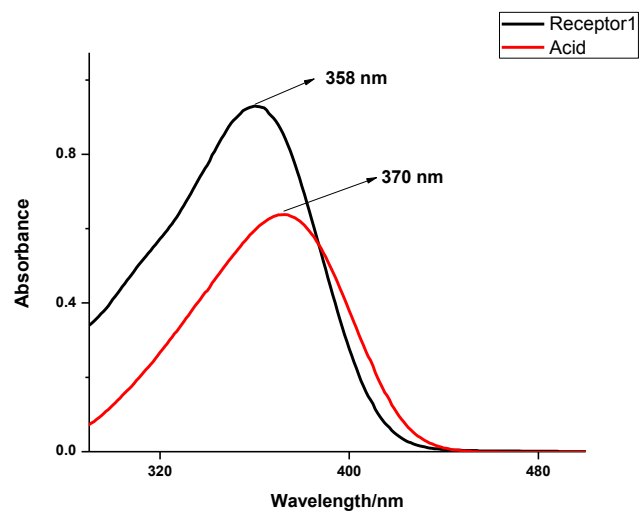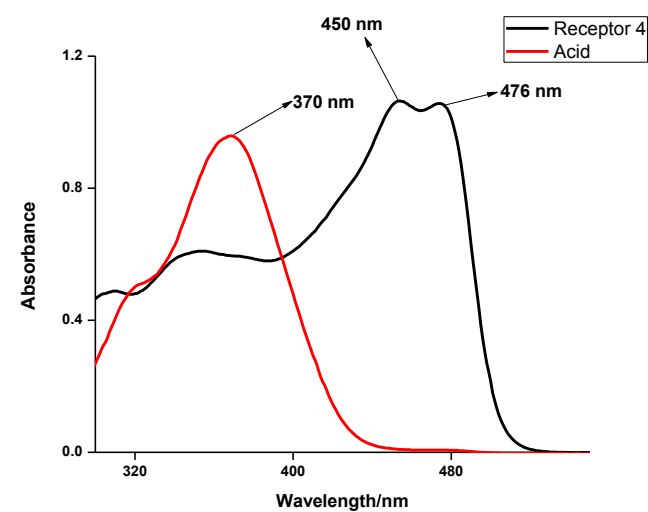

#### Effect of Mineral acid (HCl, 1 drop) on UV-visible spectra of Receptor 1 and 4

*Note: The references cited in above discussion are same as it was in the manuscript.*

### 3. FIGURES AND CAPTIONS

**Figure S1:**  $^1\text{H}$  NMR spectrum of Receptor 1 and Receptor 1 +  $\text{HSO}_4^-$  in  $\text{CD}_3\text{CN}-\text{D}_2\text{O}$

**Figure S2:**  $^1\text{H}$  NMR spectrum of isolated product as 7-amino-4-trifluoromethyl coumarin from the reaction between receptor 1 +  $\text{HSO}_4^-$  in  $\text{CDCl}_3$

**Figure S3:** ESI-Mass spectrum (M–H) of Receptor 1 +  $\text{HSO}_4^-$  showing peaks for corresponding aldehyde and amine

**Figure S4:**  $^1\text{H}$  NMR spectrum of Receptor 4 in  $\text{CD}_3\text{CN}$

**Figure S5:**  $^{13}\text{C}$  NMR spectrum of Receptor 4 in  $\text{CDCl}_3$

**Figure S6:** IR spectrum of Receptor 4

**Figure S7:** ESI Mass spectrum (M–H) of Receptor 4

**Figure S8:** X-ray crystal structure of Receptor 4 (Ortep diagram with 30% ellipsoid probability)

**Figure S9:** UV-visible spectra of receptor 1 and 4 with and without  $\text{HSO}_4^-$  along with 7-amino-4-trifluoromethyl coumarin (7-AMC); in 50  $\mu\text{M}$   $\text{CH}_3\text{CN}-\text{H}_2\text{O}$  (1:1, v/v) solution

**Figure S10:** Fluorescence spectra of receptor 1 and 4 with and without  $\text{HSO}_4^-$  along with 7-amino-4-trifluoromethyl coumarin (7-AMC); in 3  $\mu\text{M}$   $\text{CH}_3\text{CN}-\text{H}_2\text{O}$  (1:1, v/v) solution

**Figure S11:**  $^1\text{H}$  NMR spectrum of Receptor 4 and Receptor 4 +  $\text{HSO}_4^-$  in  $\text{CD}_3\text{CN}-\text{D}_2\text{O}$

**Figure S12:**  $^1\text{H}$  NMR spectrum of isolated product as 7-amino-4-trifluoromethyl coumarin and 2-hydroxy naphthaldehyde from the reaction between receptor 4 +  $\text{HSO}_4^-$  in  $\text{CDCl}_3$

**Figure S13:** ESI-Mass spectrum (M–H) of Receptor 4 +  $\text{HSO}_4^-$  showing peaks for corresponding aldehyde and amine

**Figure S14:** Absorption spectra of Receptor 3 and 3+ $\text{HSO}_4^-$  in  $\text{CH}_3\text{CN}-\text{H}_2\text{O}$  (9:1, v/v) solution:

**Figure S15:** Emission spectra of 1-Aminopyrene

**Figure S16:** Effect of metal ions of Receptor 1 and 4

**Figure S17:** Colorimetric receptors 5 and 6a-d for  $\text{HSO}_4^-$  reported by Wei et al. and Zhang et al. respectively

**Figure S18:**  $^1\text{H}$ NMR spectrum of Receptor 1 in  $\text{CD}_3\text{CN}$

**Figure S19:** IR spectrum of Receptor 1

**Figure S20:** ESI-Mass spectrum ( $\text{M}+\text{H}$ ) of Receptor 1

**Figure S21:**  $^1\text{H}$ NMR spectrum of Receptor 3 in  $\text{CD}_3\text{CN}$

**Figure S22:** IR spectrum of Receptor 3

**Scheme 1:** Hydrogen bonding *vs.* Hydrolysis of Schiff base receptor 1 in the presence of  $\text{HSO}_4^-$

**Scheme 2:** Hydrogen bonding *vs.* Hydrolysis of Schiff base receptor 3 in the presence of  $\text{HSO}_4^-$  and  $\text{Hg}^{2+}/\text{Al}^{3+}$

**Table S1:** Crystal data of receptor 4



Figure S1:  $^1\text{H}$  NMR spectrum of Receptor 1 and Receptor 1 +  $\text{HSO}_4^-$  in  $\text{CD}_3\text{CN}-\text{D}_2\text{O}$

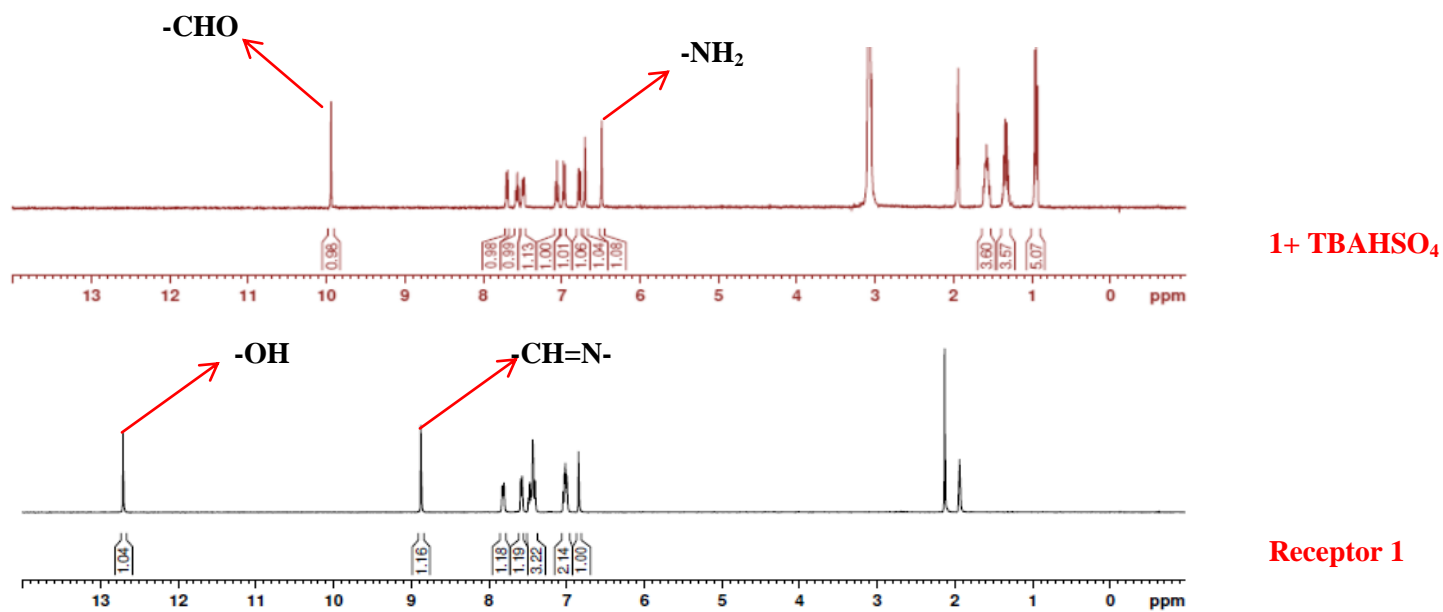

Figure S2:  $^1\text{H}$  NMR spectrum of isolated product as *7-amino-4-trifluoromethyl coumarin* from the reaction between receptor 1 +  $\text{HSO}_4^-$  in  $\text{CDCl}_3$

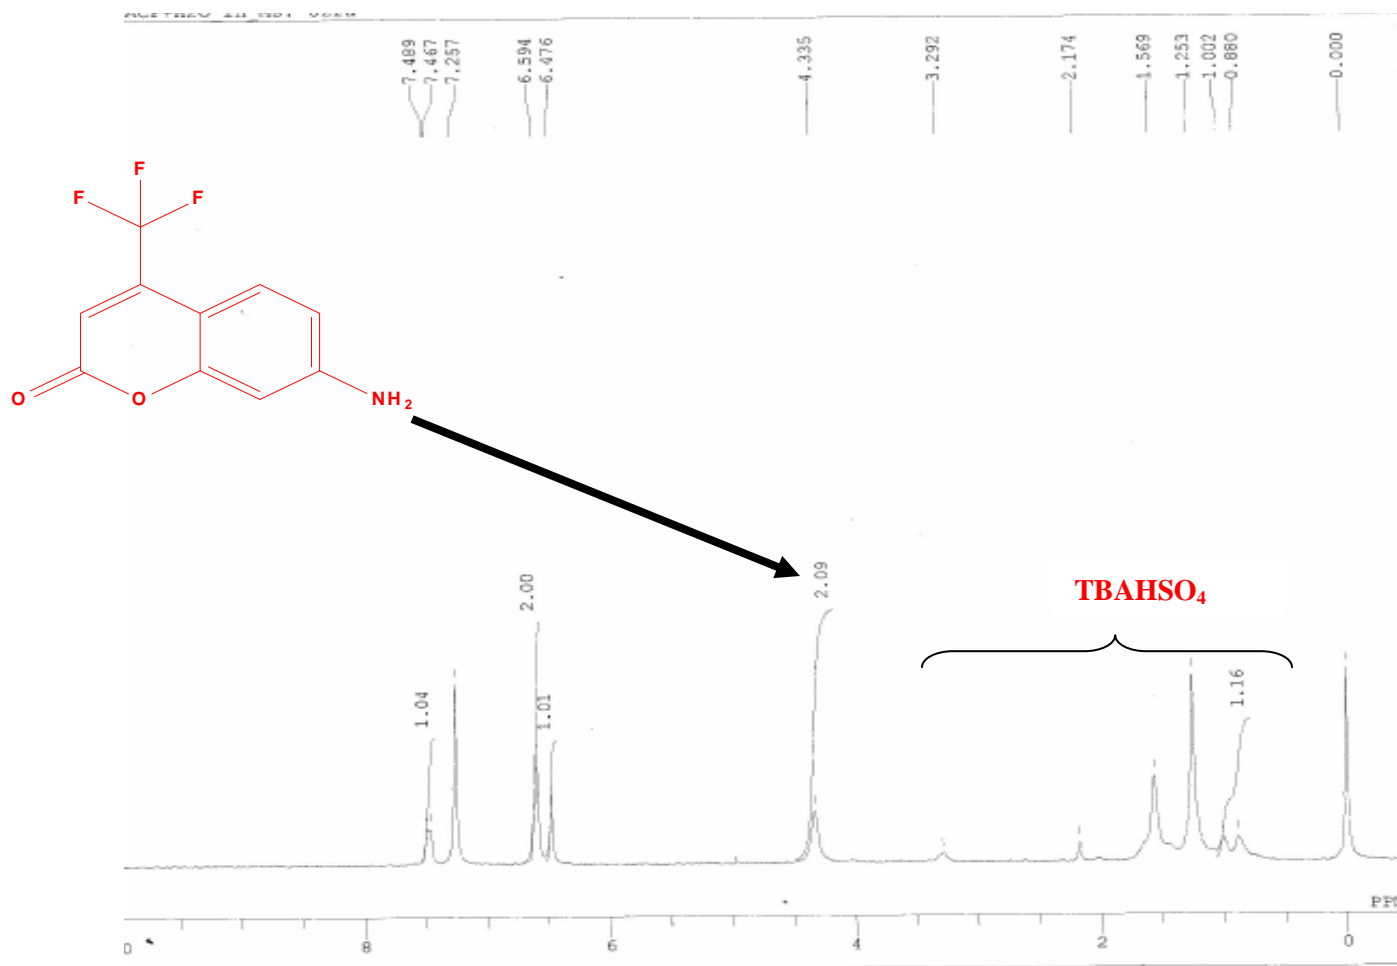

**Figure S3: ESI-Mass spectrum (M-H) of Receptor 1 + HSO<sub>4</sub><sup>-</sup> showing peaks for corresponding aldehyde and amine**

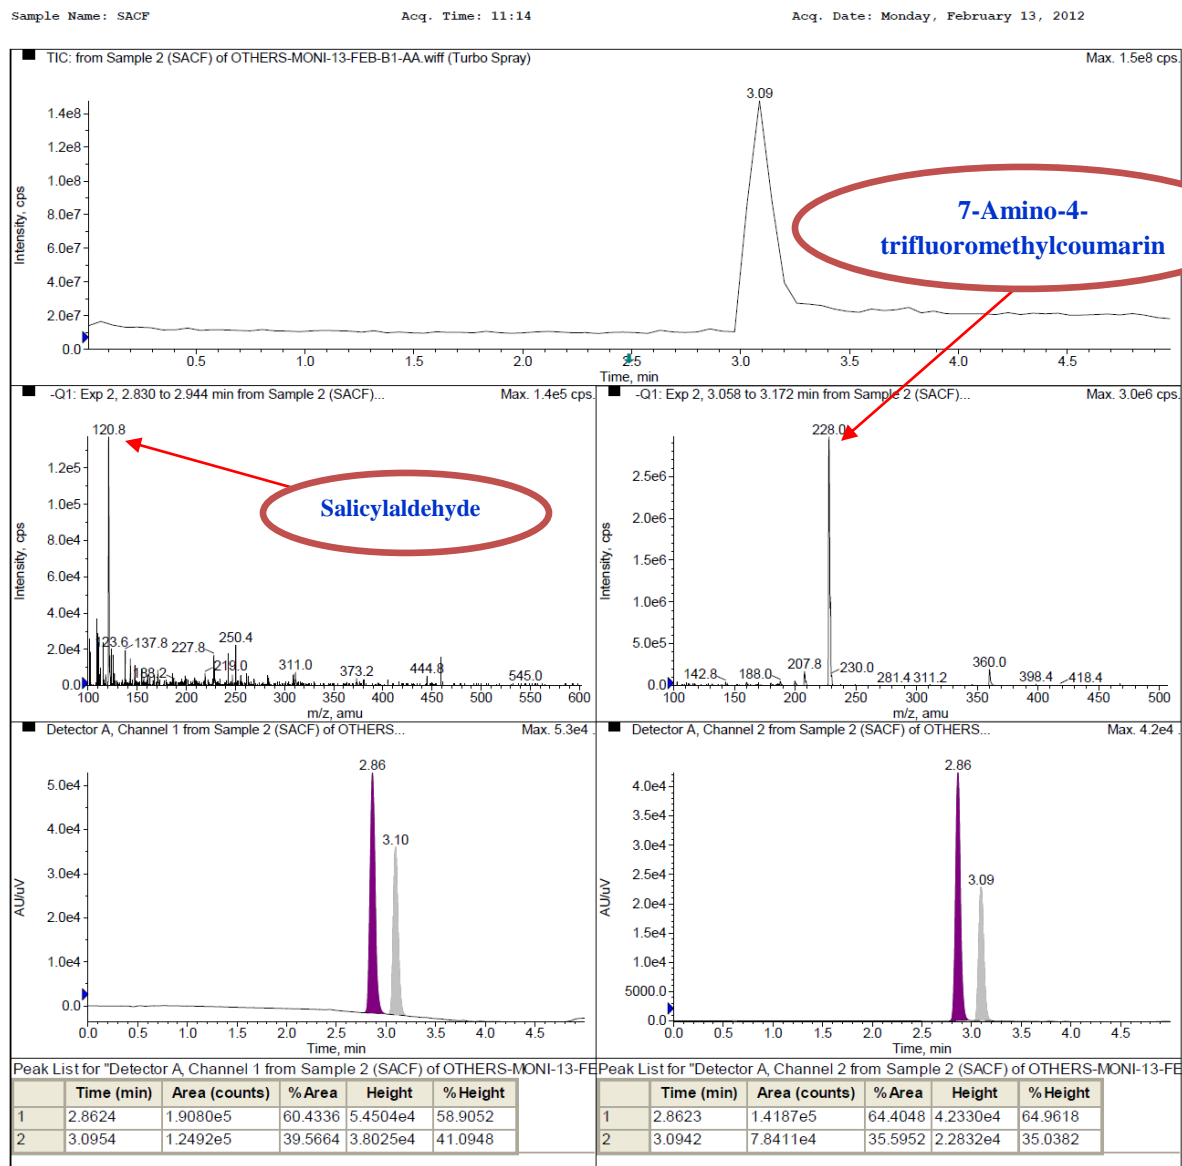

Figure S4:  $^1\text{H}$  NMR spectrum of Receptor 4 in  $\text{CD}_3\text{CN}$

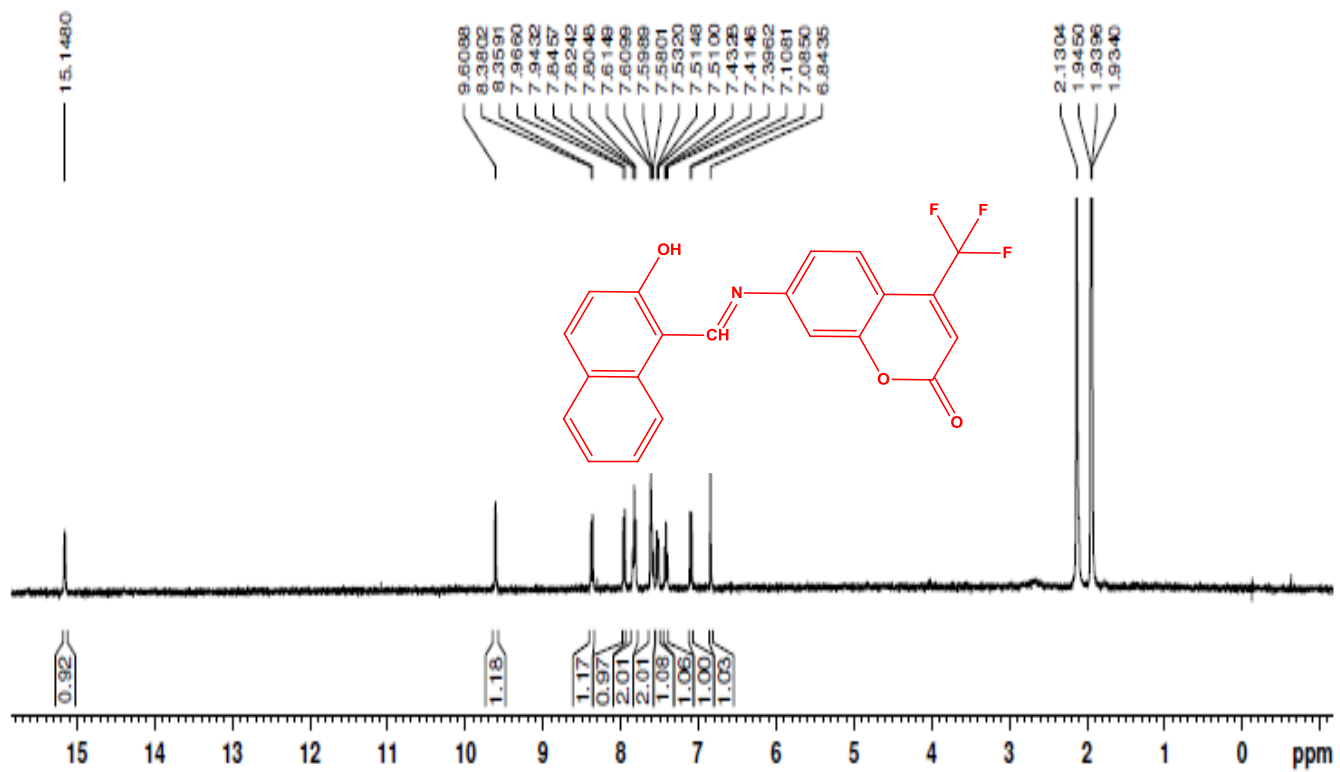

Figure S5:  $^{13}\text{C}$  NMR spectrum of Receptor 4 in  $\text{CDCl}_3$

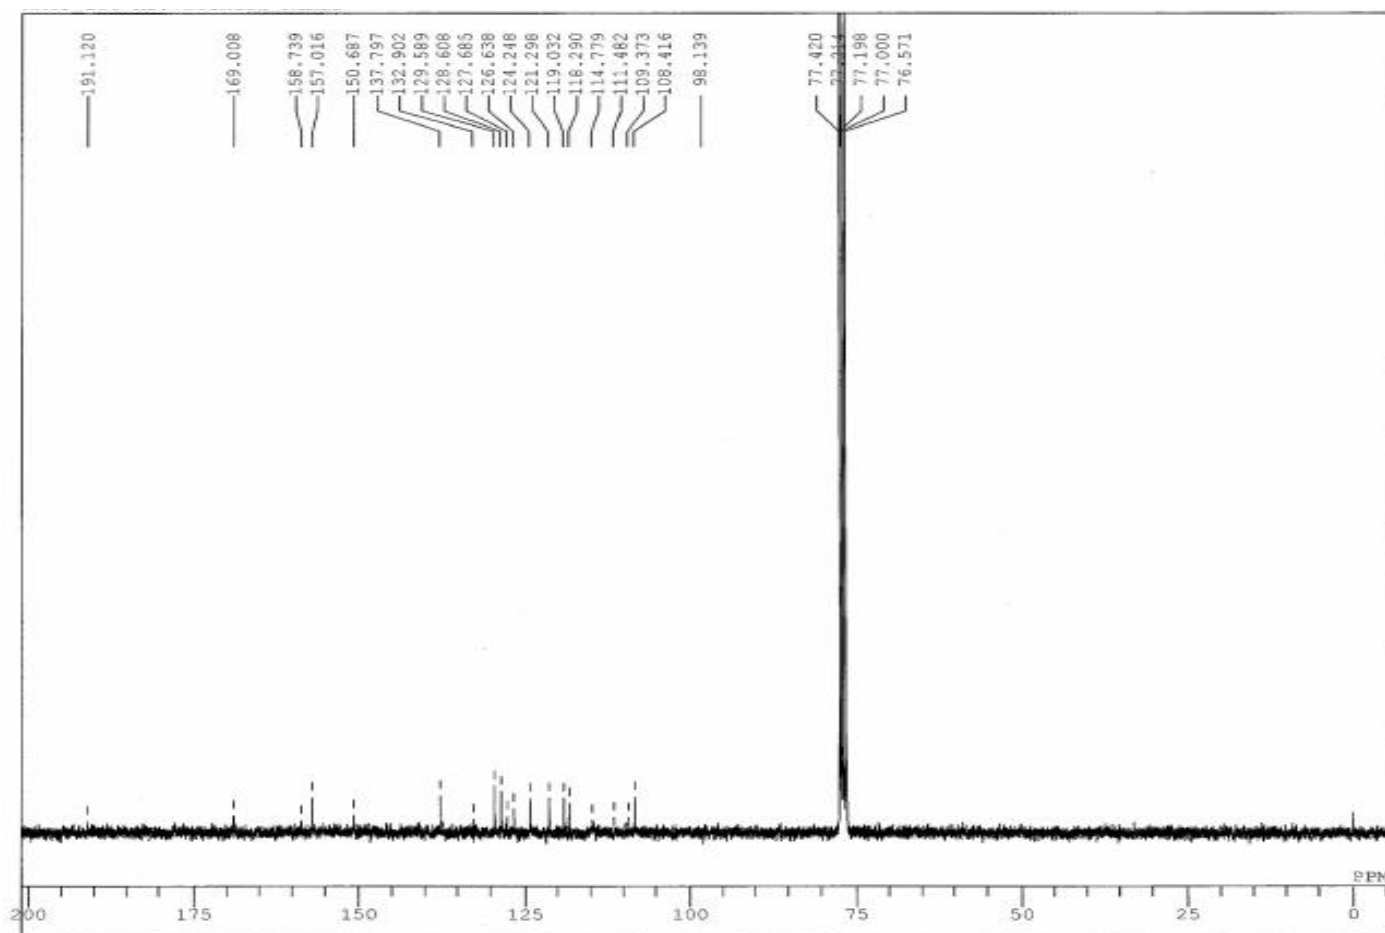

Figure S6: IR spectrum of Receptor 4

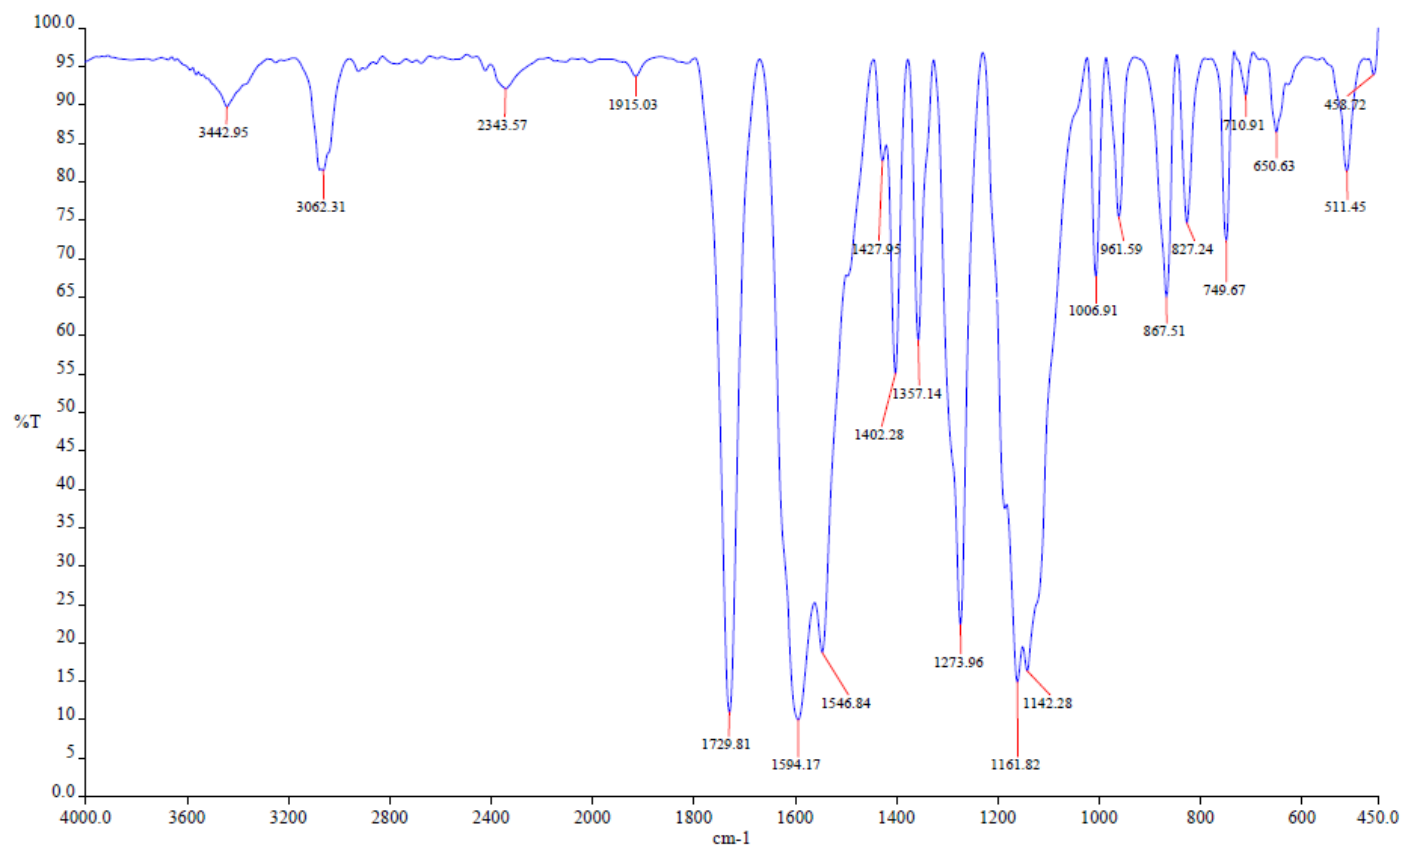

**Figure S7: ESI Mass spectrum (M-H) of Receptor 4**

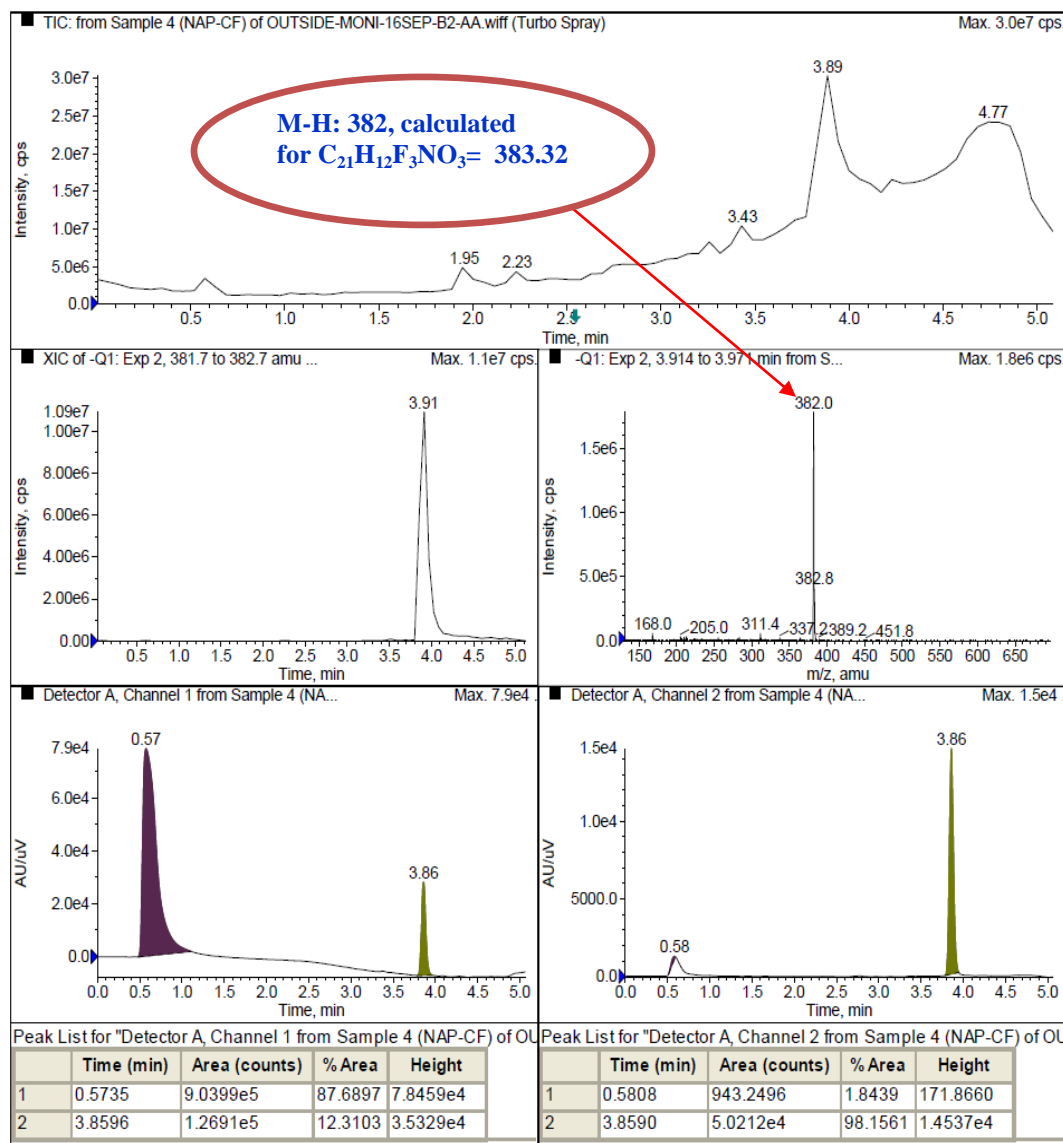

**Figure S8: X-ray crystal structure of Receptor 4 (Ortep diagram with 30% ellipsoid probability)**

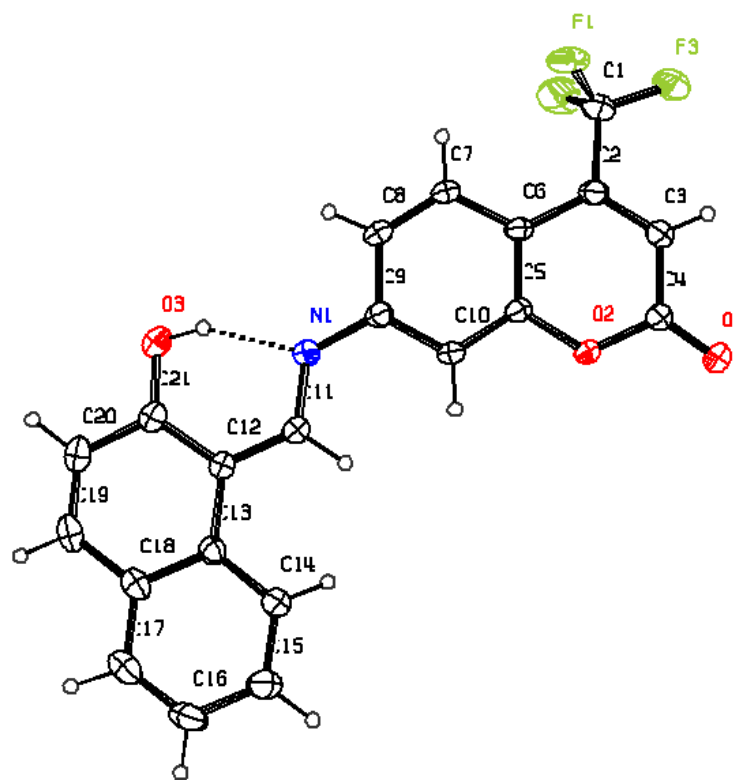



**Figure S9: UV-visible spectra of receptor 1 and 4 with and without  $\text{HSO}_4^-$  along with 7-amino-4-trifluoromethyl coumarin (7-AMC); in 50  $\mu\text{M}$   $\text{CH}_3\text{CN-H}_2\text{O}$  (1:1, v/v) solution**

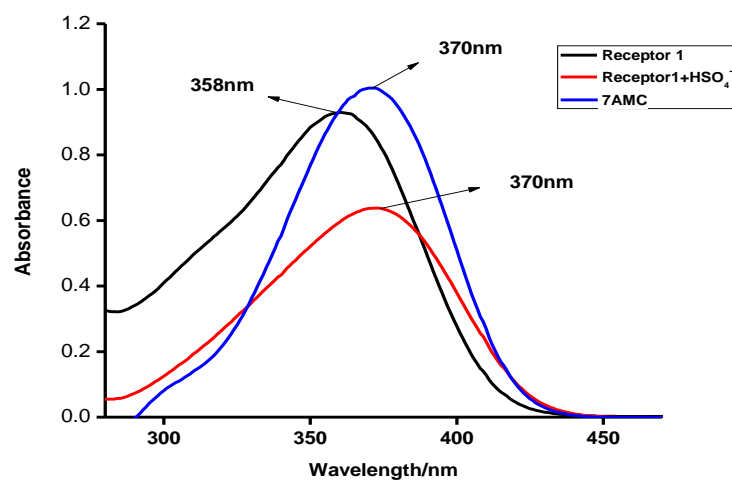

**Receptor 1**

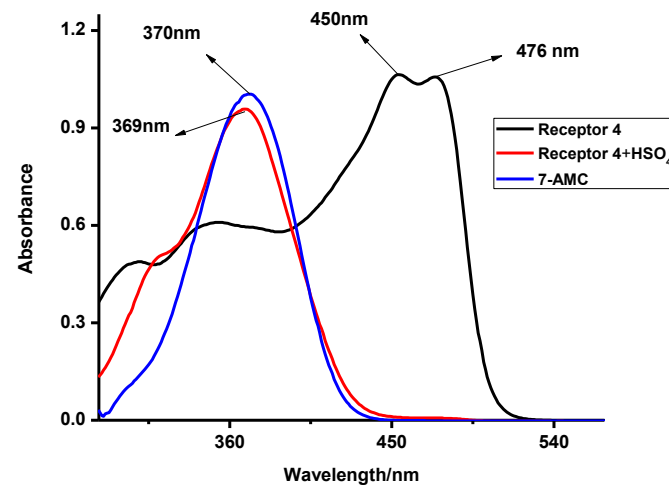

**Receptor 4**

**Figure S10: Fluorescence spectra of receptor 1 and 4 with and without  $\text{HSO}_4^-$  along with 7-amino-4-trifluoromethyl coumarin (7-AMC); in 3  $\mu\text{M}$   $\text{CH}_3\text{CN}-\text{H}_2\text{O}$  (1:1, v/v) solution**

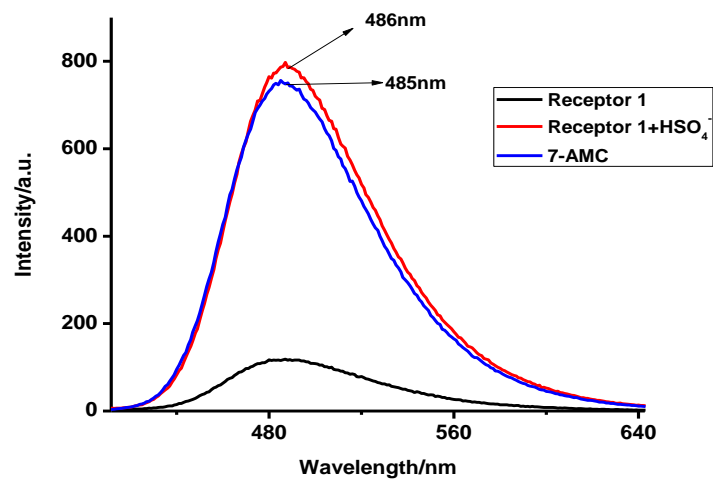

**Receptor 1**

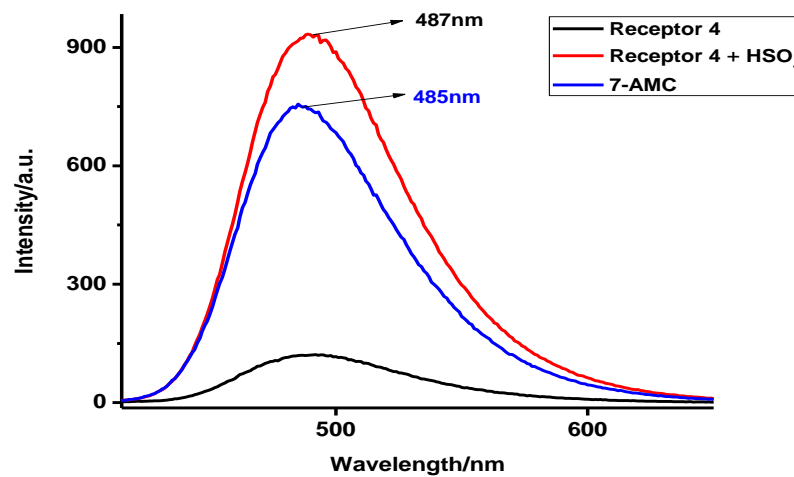

**Receptor 4**

Figure S11:  $^1\text{H}$  NMR spectrum of Receptor 4 and Receptor 4 +  $\text{HSO}_4^-$  in  $\text{CD}_3\text{CN}-\text{D}_2\text{O}$

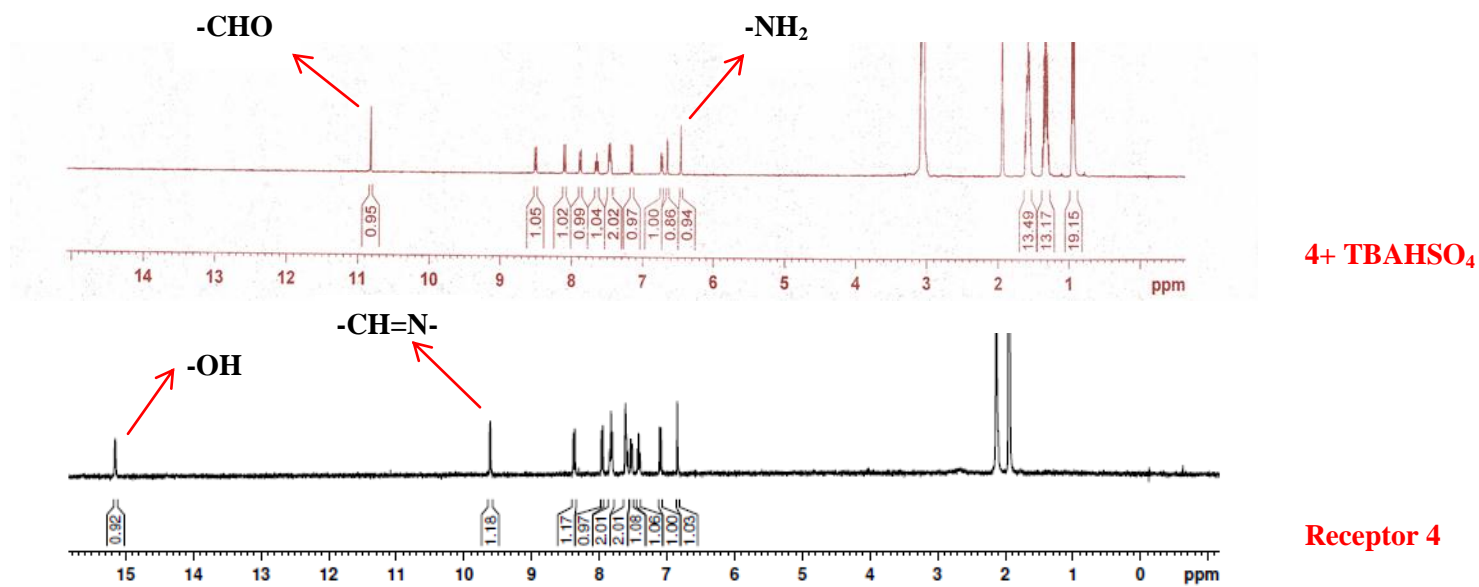

**Figure S12:**  $^1\text{H}$  NMR spectrum of isolated product as 7-amino-4-trifluoromethyl coumarin and 2-hydroxy naphthaldehyde from the reaction between receptor 4 +  $\text{HSO}_4^-$  in  $\text{CDCl}_3$

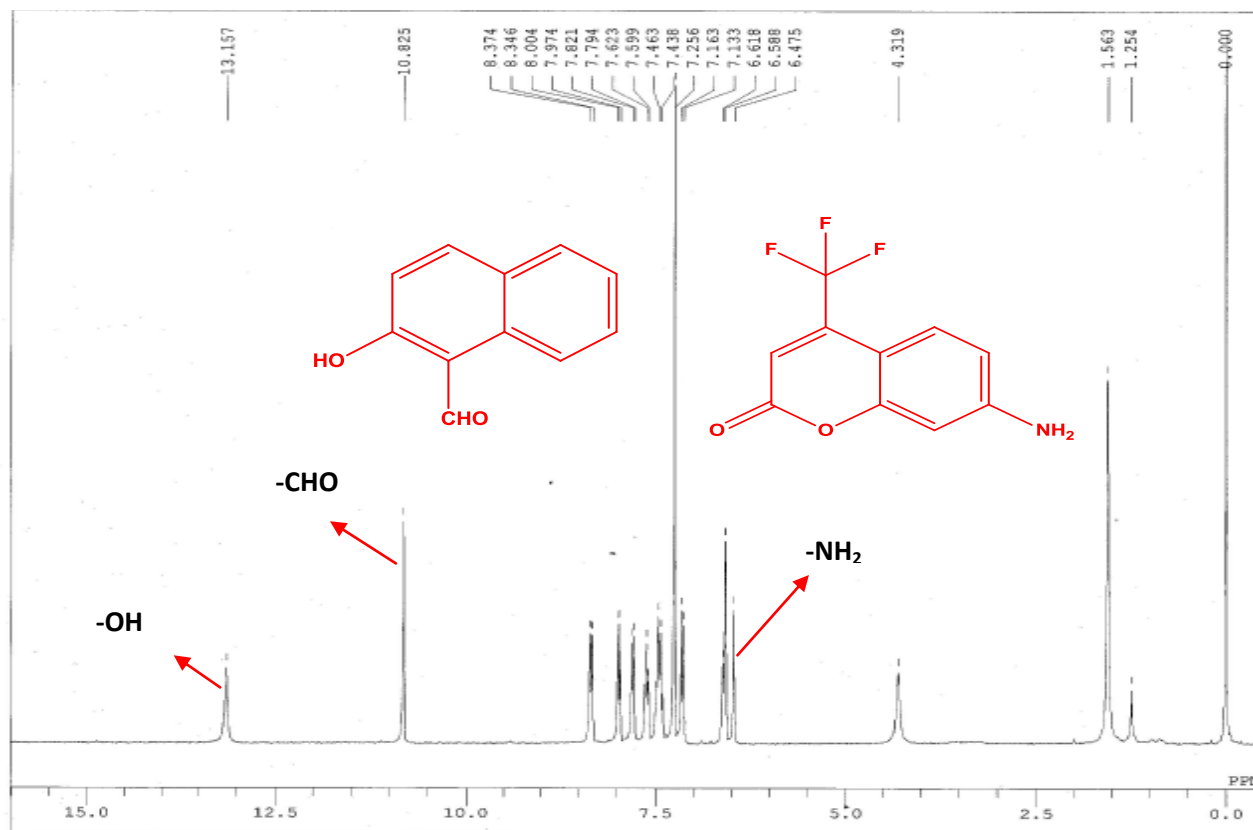

**Figure S13: ESI-Mass spectrum (M-H) of Receptor 4 + HSO<sub>4</sub><sup>-</sup> showing peaks for corresponding aldehyde and amine**

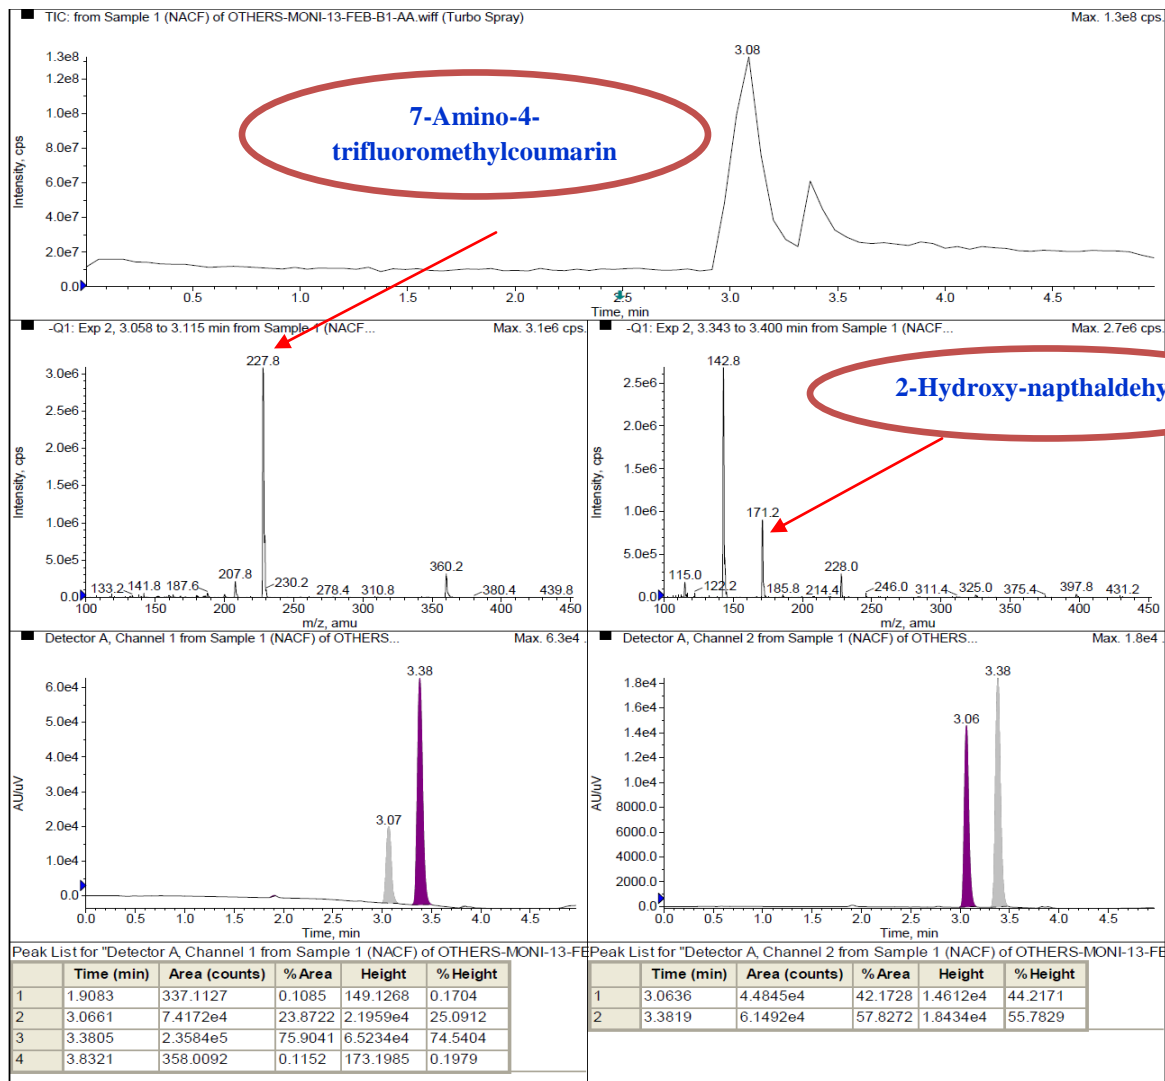

**Figure S14: Absorption spectra of Receptor 3 and 3+HSO<sub>4</sub><sup>-</sup> in CH<sub>3</sub>CN-H<sub>2</sub>O (9:1, v/v) solution:**

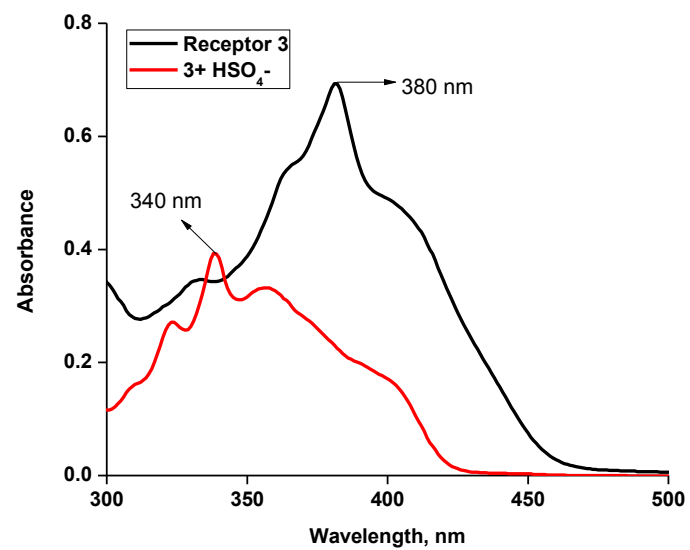

**Figure S15: Emission spectra of 1-Aminopyrene**

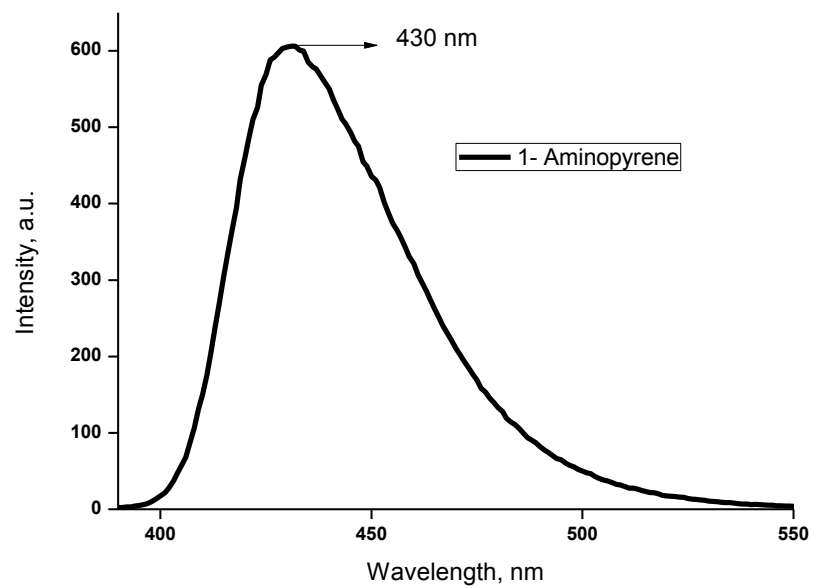

**Figure S16: Effect of metal ions on Receptor 1 and 4**

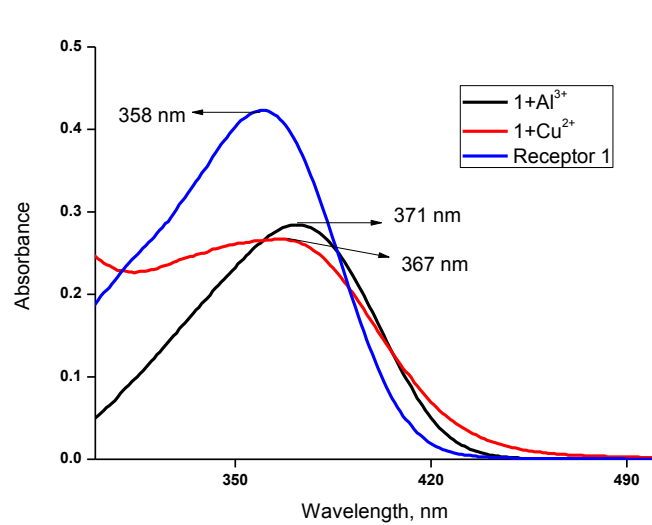

**Receptor 1**

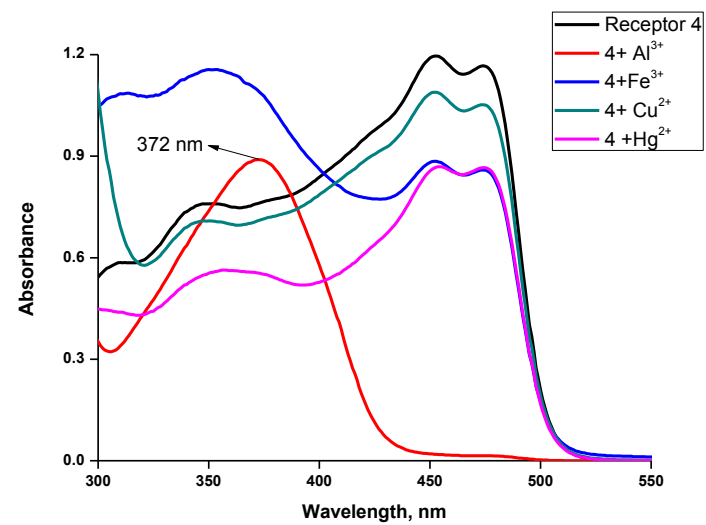

**Receptor 4**



**Figure S17 Colorimetric receptors 5 and 6a-d for  $\text{HSO}_4^-$  reported by Wei et al. and Zhang et al. respectively**

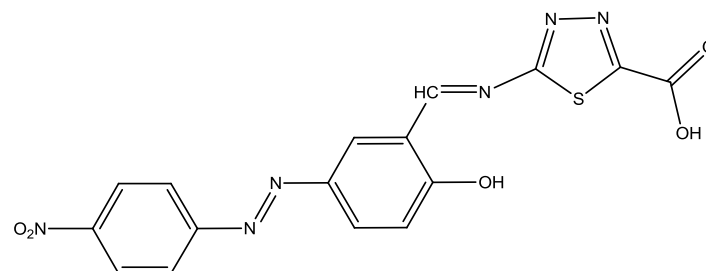

**Receptor 5**

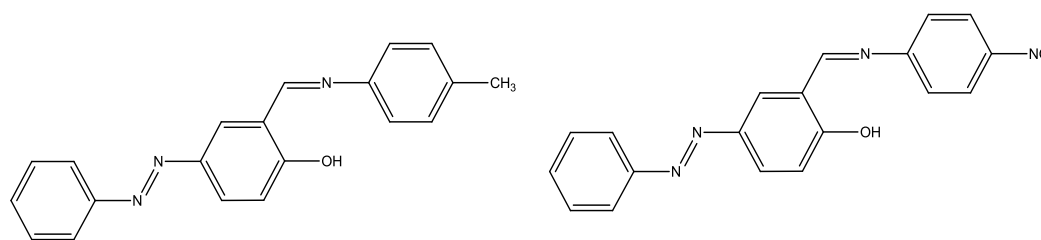

**Receptor 6a**

**Receptor 6b**

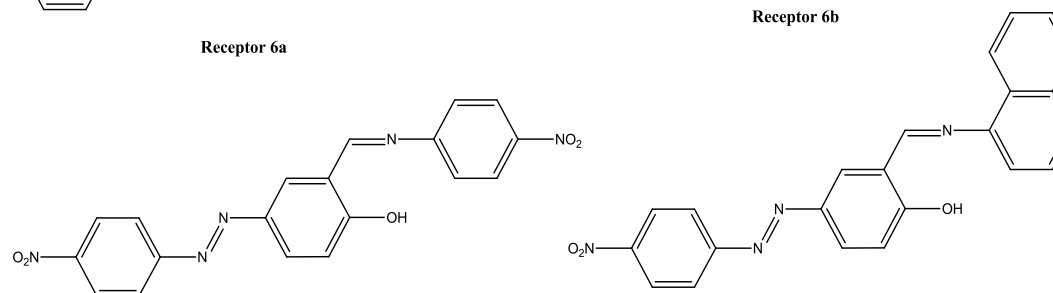

**Receptor 6c**

**Receptor 6d**

**Receptor 6a-d**

Figure S18:  $^1\text{H}$  NMR spectrum of Receptor 1 in  $\text{CD}_3\text{CN}$

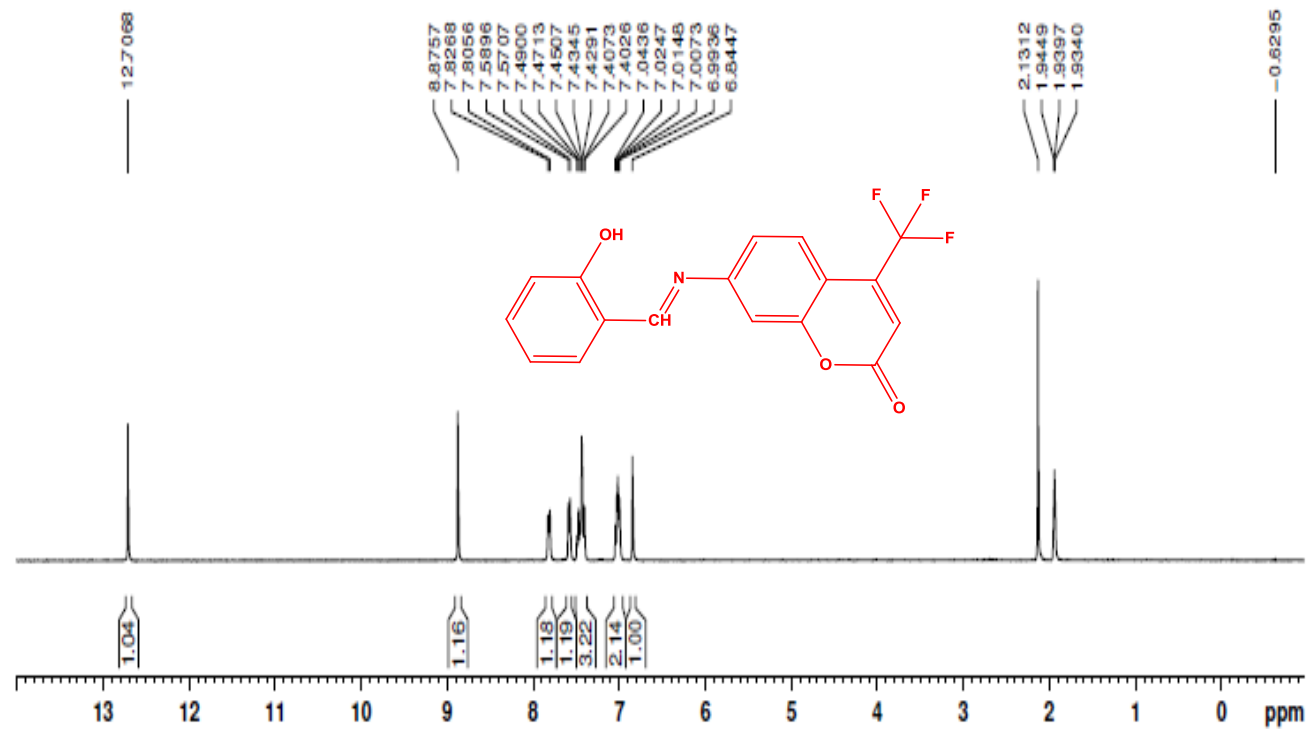

Figure S19: IR spectrum of Receptor 1

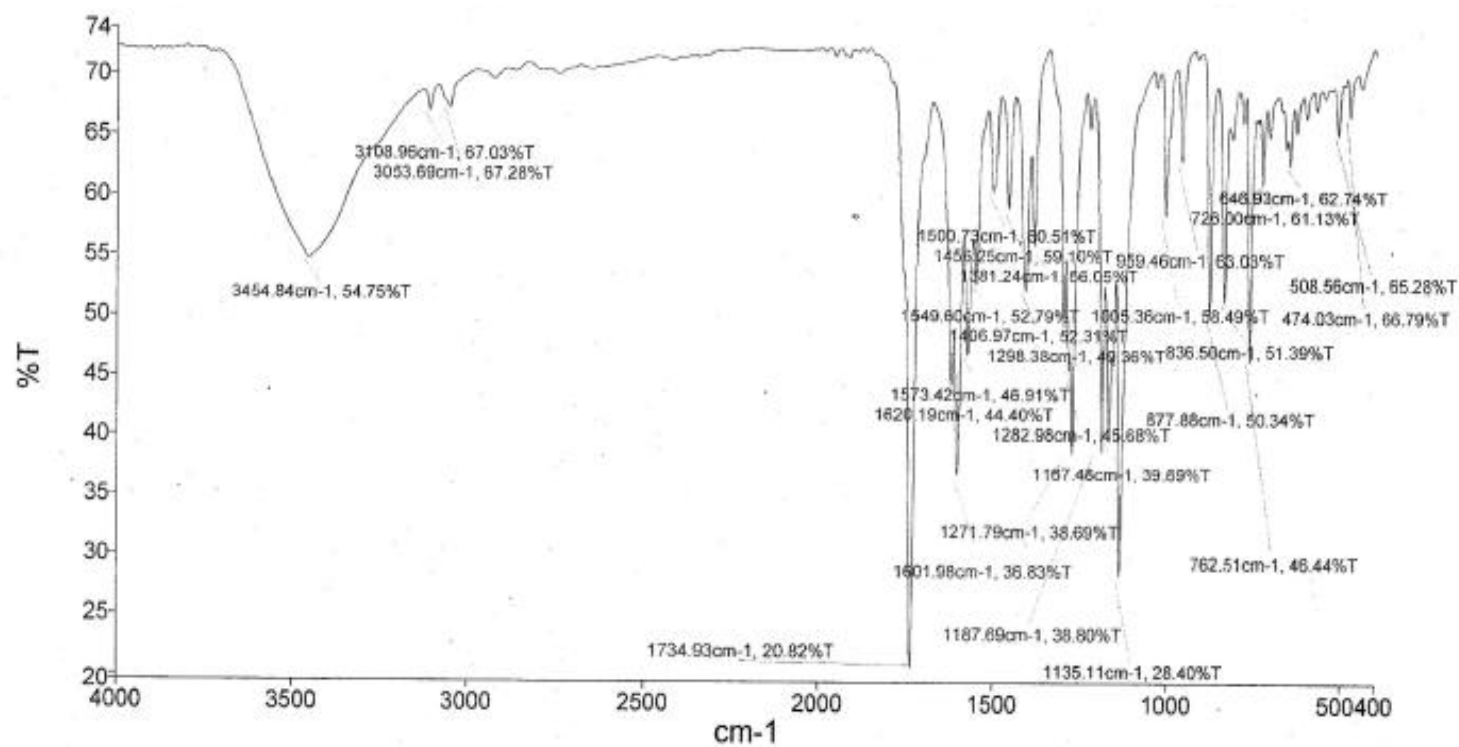

**Figure S20: ESI-Mass spectrum (M+H) of Receptor 1**

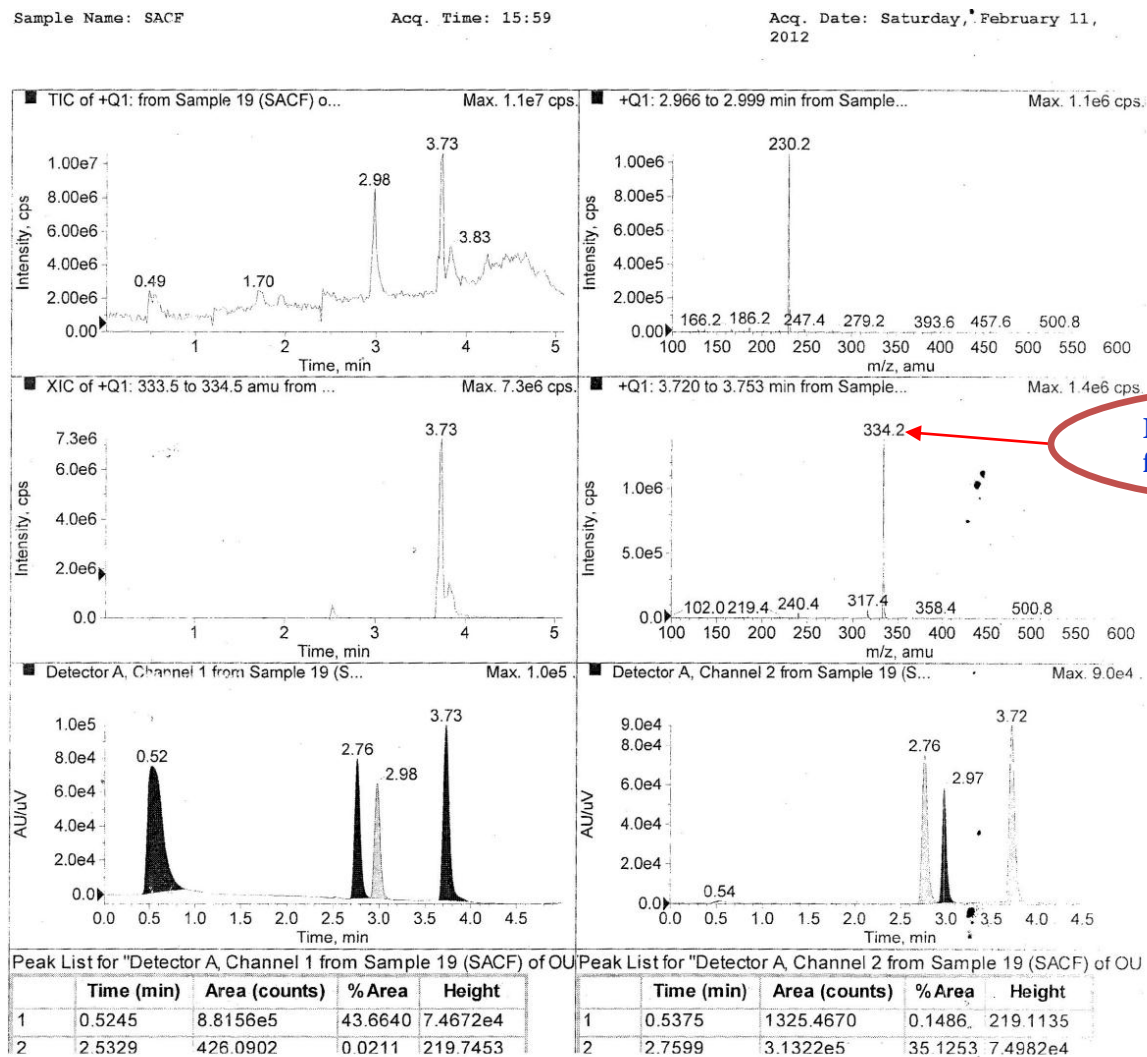

Figure S21:  $^1\text{H}$  NMR spectrum of Receptor 3 in  $\text{CDCl}_3$

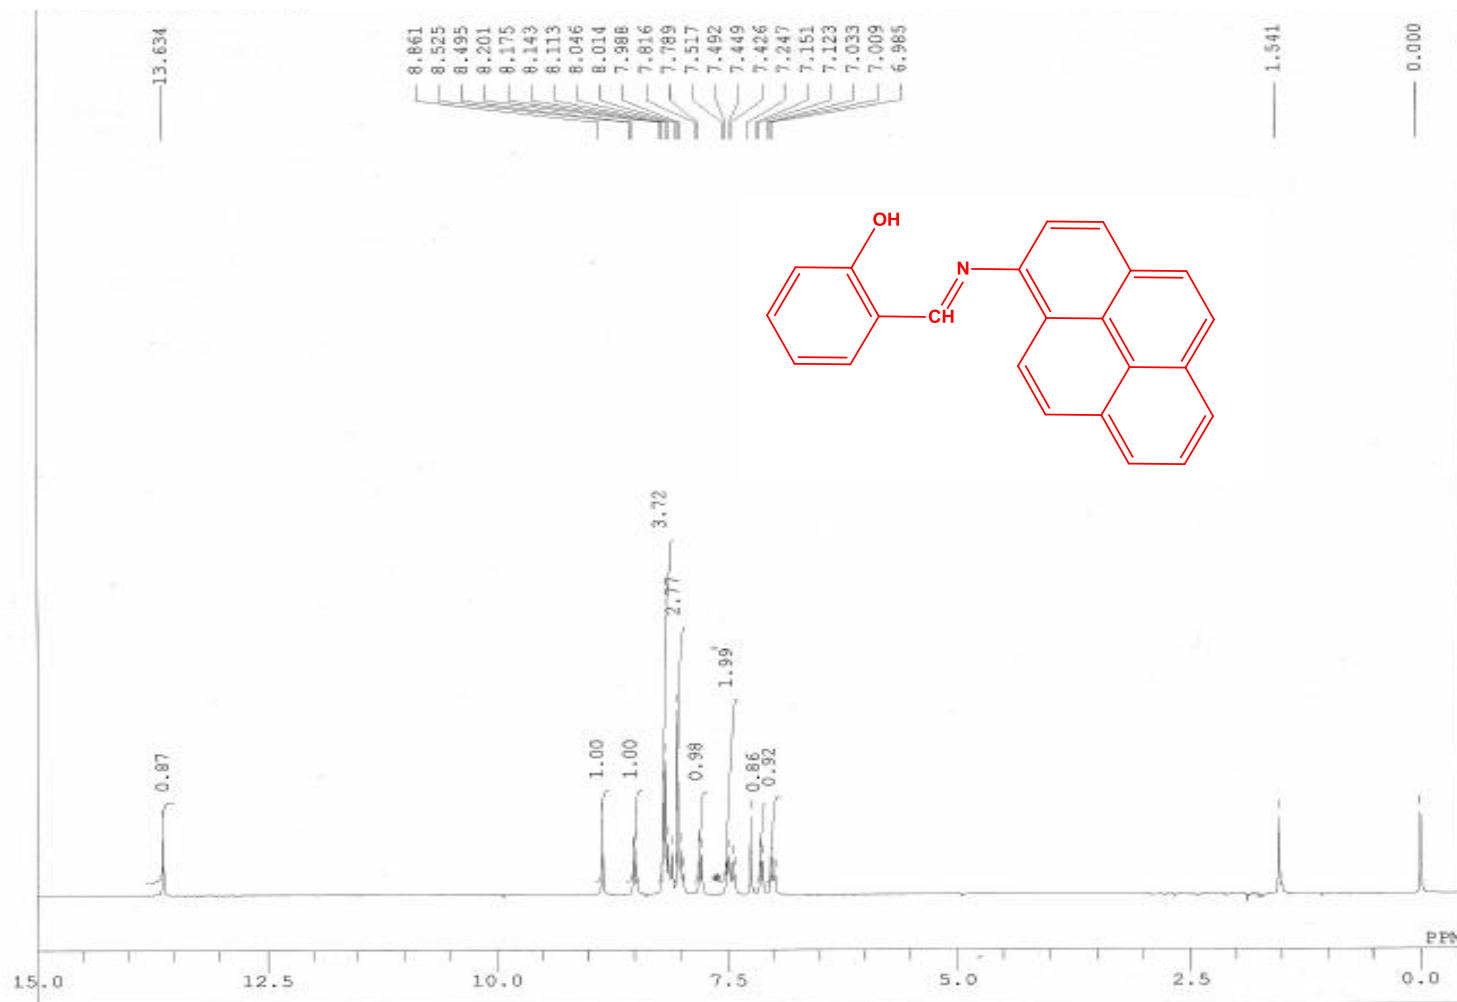

Figure S22: IR spectrum of Receptor 3

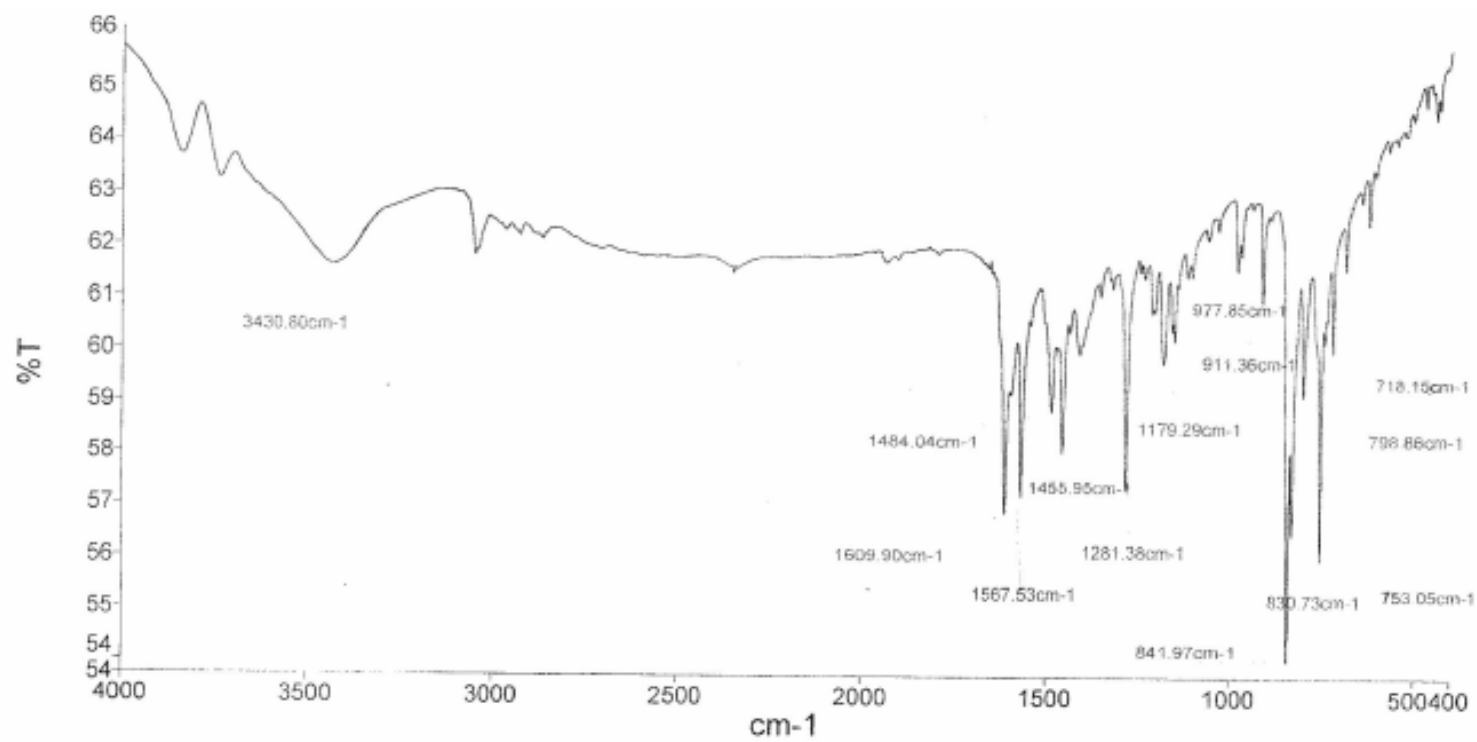

**Scheme 1: Hydrogen bonding vs. Hydrolysis of Schiff base receptor 1 in the presence of  $\text{HSO}_4^-$**

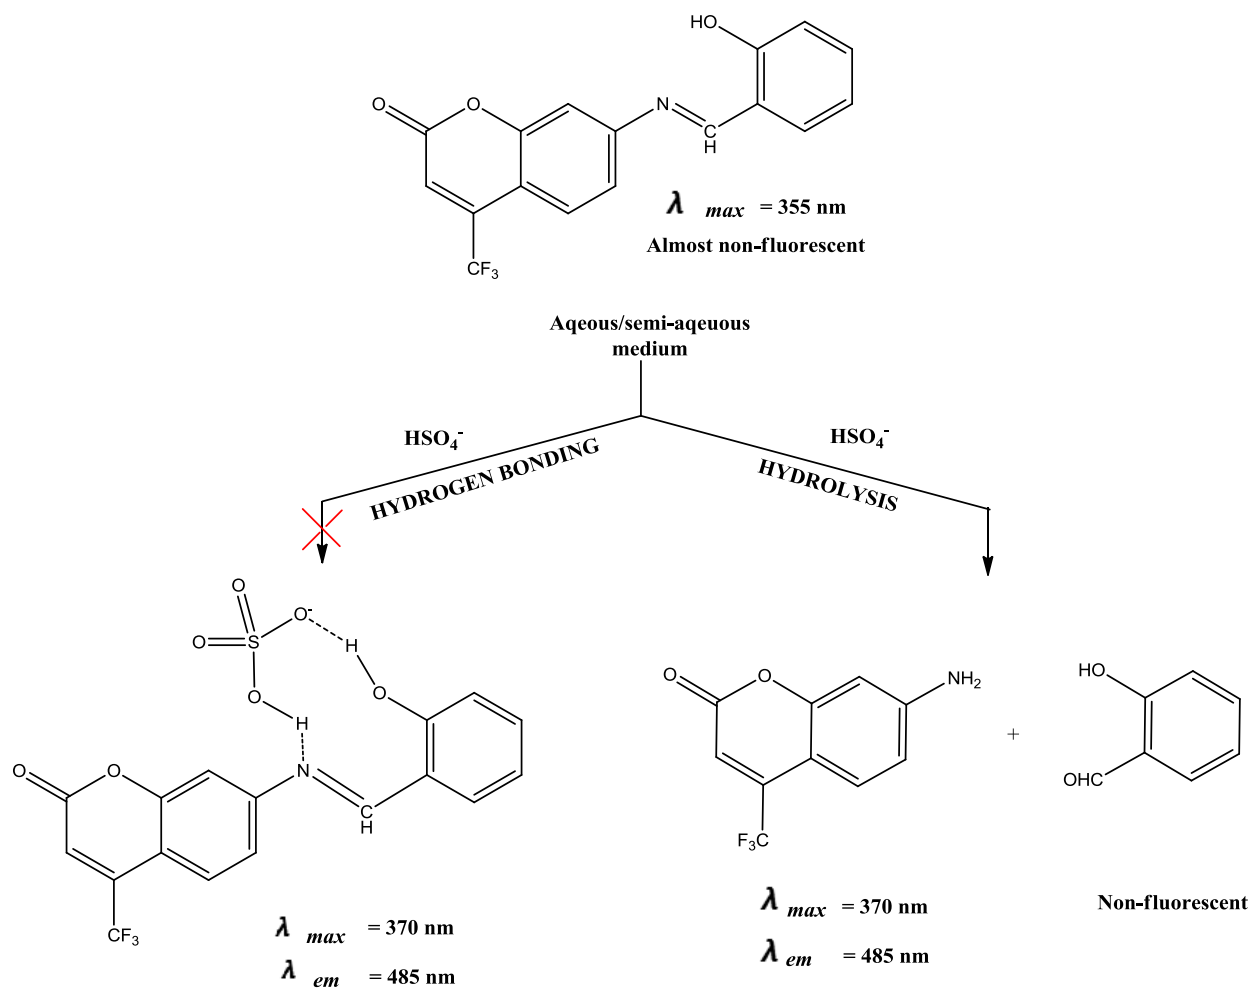

**Scheme 2: Hydrogen bonding vs. Hydrolysis of Schiff base receptor 3 in the presence of  $\text{HSO}_4^-$  and  $\text{Hg}^{2+}/\text{Al}^{3+}$**

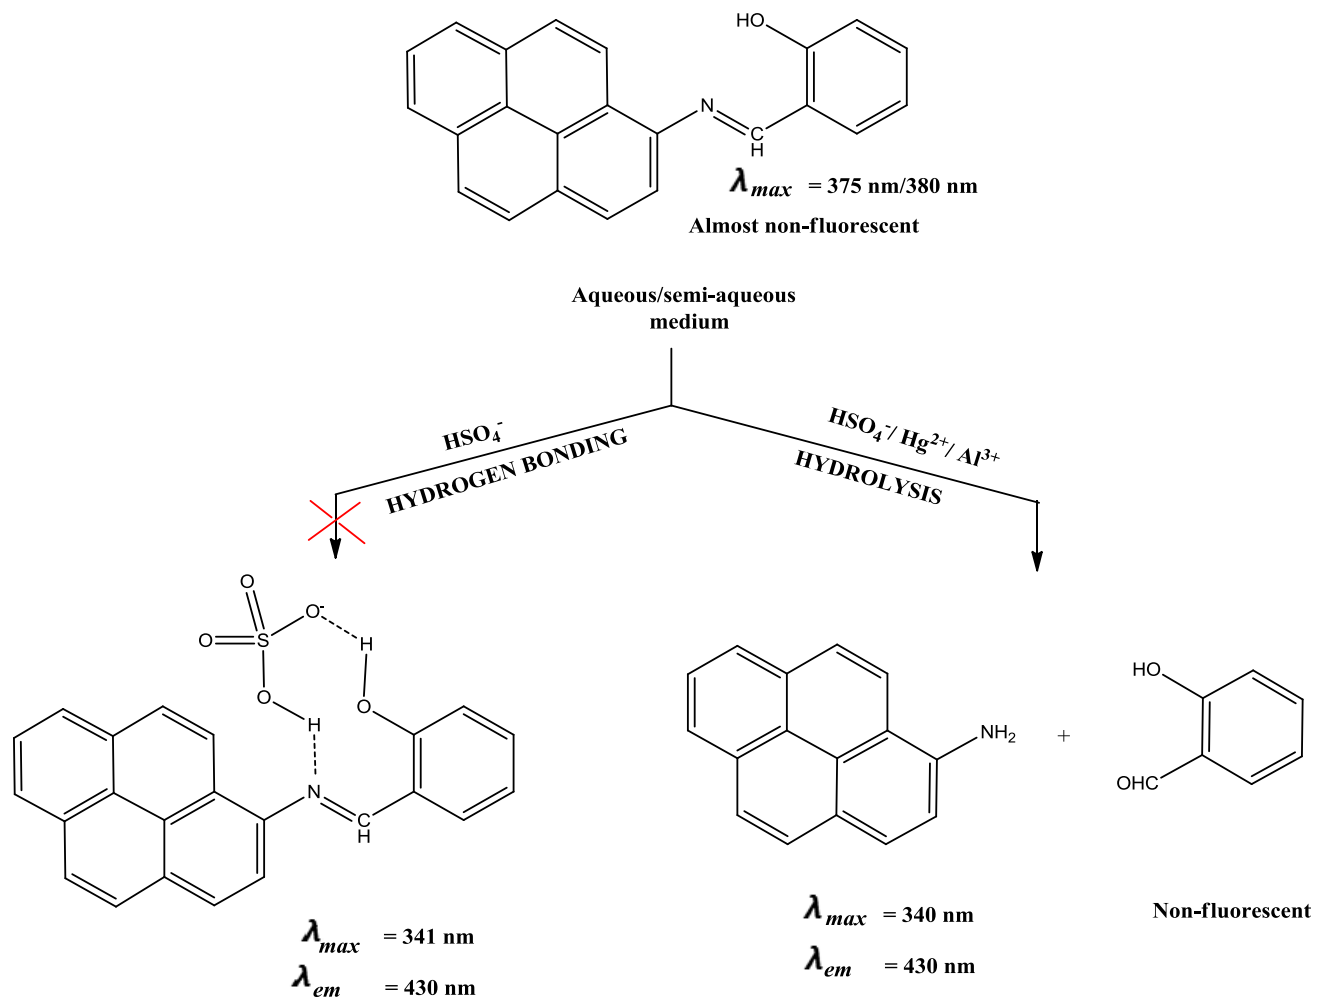



**Table S1- Crystal data of receptor 4**

|                                   |                                                                                                                   |
|-----------------------------------|-------------------------------------------------------------------------------------------------------------------|
| <b>CCDC No.</b>                   | <b>873622</b>                                                                                                     |
| Identification code               | Receptor 4                                                                                                        |
| Empirical formula                 | C <sub>21</sub> H <sub>15</sub> F <sub>3</sub> N O <sub>3</sub>                                                   |
| Formula weight                    | 386.34                                                                                                            |
| Temperature                       | 293(2) K                                                                                                          |
| Wavelength                        | 0.71073 Å                                                                                                         |
| Crystal system                    | Triclinic                                                                                                         |
| space group                       | P -1                                                                                                              |
| Unit cell dimensions              | a = 6.2911(7) Å    α = 109.076(10)°<br>b = 11.5341(13) Å    β = 99.931(9)°<br>c = 12.3473(13) Å    γ = 91.579(9)° |
| Volume                            | 830.66(16) Å <sup>3</sup>                                                                                         |
| Z                                 | 2                                                                                                                 |
| Density (calculated)              | 1.545 Mg/m <sup>3</sup>                                                                                           |
| Absorption coefficient            | 0.126 mm <sup>-1</sup>                                                                                            |
| F(000)                            | 398                                                                                                               |
| Crystal size                      | 0.24 x 0.22 x 0.18 mm                                                                                             |
| Crystal color and habit           | Red Rectangular                                                                                                   |
| Diffractometer                    | 'Xcalibur, Eos                                                                                                    |
| Theta range for data collection   | 3.30 to 29.01°                                                                                                    |
| Limiting indices                  | -8<=h<=5, -15<=k<=15, -16<=l<=15                                                                                  |
| Reflections collected / unique    | 6250 / 3759 [R(int) = 0.0216]                                                                                     |
| Completeness to theta = 25.00°    | 99.9 %                                                                                                            |
| Absorption correction             | Semi-empirical from equivalents                                                                                   |
| Max. and min. transmission        | 1.00000 and 0.94287                                                                                               |
| Refinement method                 | Full-matrix least-squares on F <sup>2</sup>                                                                       |
| Data / restraints / parameters    | 3759 / 0 / 285                                                                                                    |
| Goodness-of-fit on F <sup>2</sup> | 1.027                                                                                                             |
| Final R indices [I>2sigma(I)]     | R1 = 0.0530, wR2 = 0.1288                                                                                         |
| R indices (all data)              | R1 = 0.0862, wR2 = 0.1540                                                                                         |
| Largest diff. peak and hole       | 0.385 and -0.211 e.Å <sup>-3</sup>                                                                                |
